# Supplementary material for: Surface molecular imprinting on silane-functionalized carbon dots for selective recognition of nifedipine
Source: Royal Society of Chemistry journal article supplement (doi:10.1039/c5ra12189b), 2015-01-01
Supplement: c5ra12189b1.pdf [file c5ra12189b1.pdf]

## Electronic Supplementary Material (ESM)

### Surface Molecular Imprinting on Silane-Functionalized Carbon Dots for Selective Recognition of Nifedipine

Mohammad Amjadi\* and Roghaye Jalili

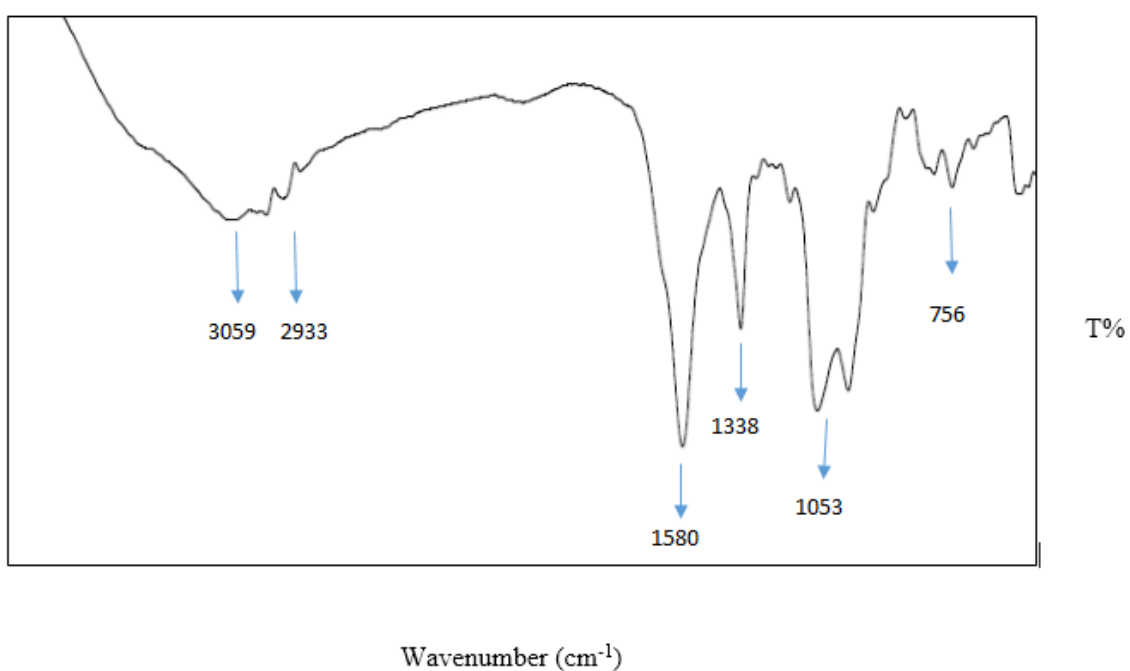

**Fig. S1.** FT-IR spectrum of SiC-dots.

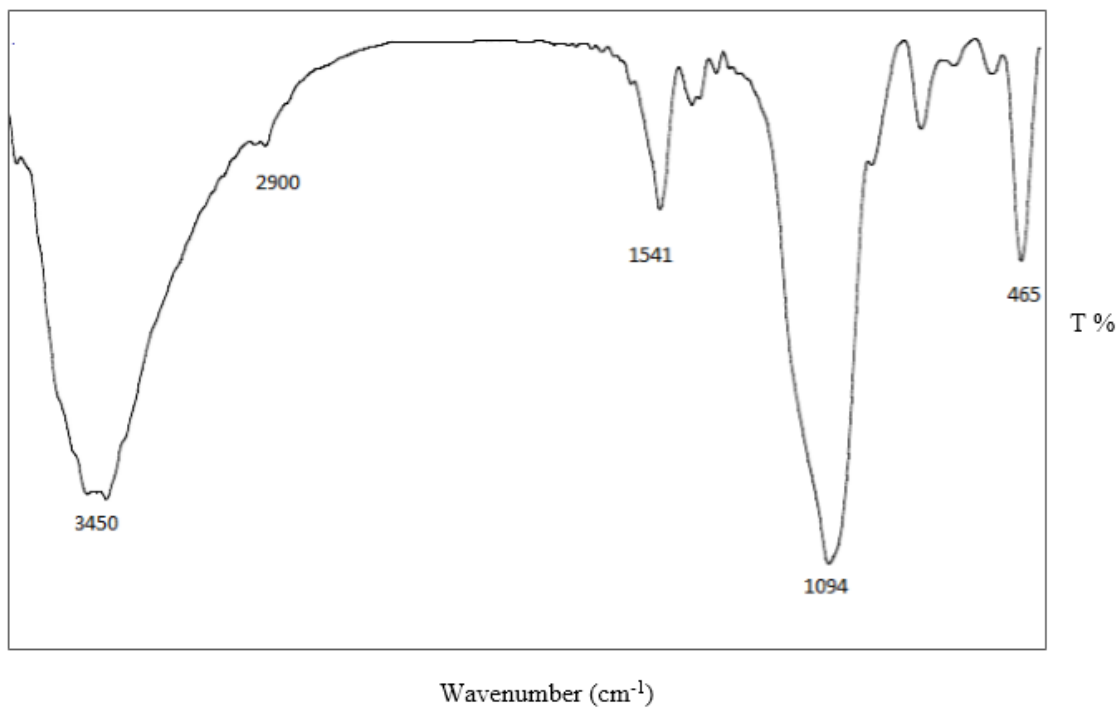

**Fig. S2.** FT-IR spectrum of (a) MIP@SiC-dots.

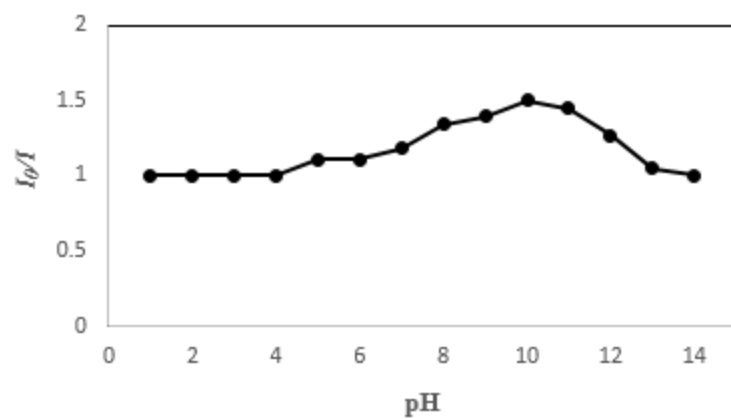

**Fig. S3.** Effects of pH the on the fluorescence changes of sensor

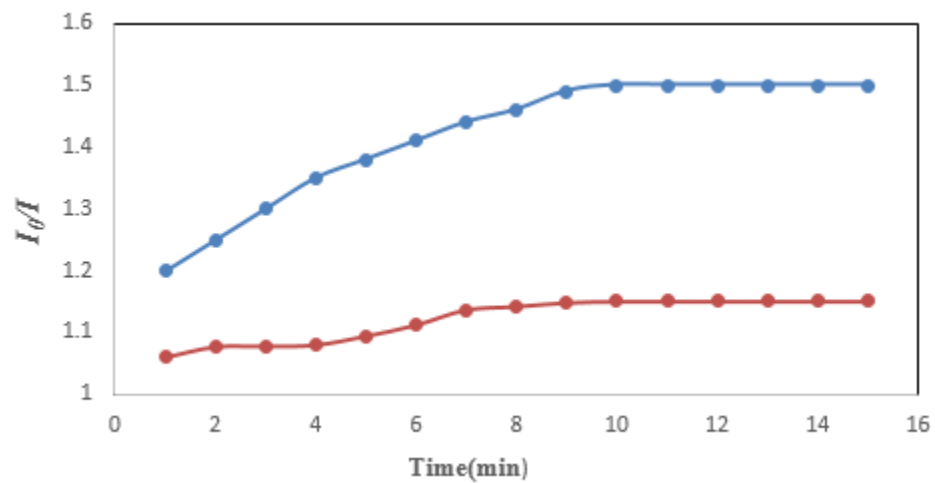

**Fig. S4.** Kinetic uptake of NIF molecules on to MIP@SiC-dots (blue), NIP@SiC-dots (red).
